1 **Improved Score Statistics for Meta-analysis in Single-variant and Gene-level**

2 **Association Studies**

3 Jingjing Yang<sup>1,2\*</sup>, Sai Chen<sup>1</sup>, Gonçalo Abecasis<sup>1\*</sup>, IAMDGC

4

5 <sup>1</sup>Center for Statistical Genetics, Department of Biostatistics, University of Michigan

6 School of Public Health, Ann Arbor, MI 48109, USA

7 <sup>2</sup>Department of Human Genetics, Center for Computational and Quantitative Genetics,

8 Emory University School of Medicine, Atlanta, GA 30322, USA

9

10 \* Correspondence authors: J.Y. ([jyang51@emory.edu](mailto:jyang51@emory.edu)) and G.A. ([goncalo@umich.edu](mailto:goncalo@umich.edu))

11

12 **Abstract**

13 Meta-analysis is now an essential tool for genetic association studies, allowing these to  
14 combine large studies and greatly accelerating the pace of genetic discovery. Although  
15 the standard meta-analysis methods perform equivalently as the more cumbersome joint  
16 analysis under ideal settings, they result in substantial power loss under unbalanced  
17 settings with various case-control ratios. Here, we investigate why the standard meta-  
18 analysis methods lose power under unbalanced settings, and further propose a novel  
19 meta-analysis method that performs as efficiently as joint analysis under general  
20 settings. Our proposed method can accurately approximate the score statistics  
21 obtainable by joint analysis, for both linear and logistic regression models, with and  
22 without covariates. In addition, we propose a novel approach to adjust for population  
23 stratification by correcting for known population structures through minor allele  
24 frequencies (MAFs). In the simulated gene-level association studies under unbalanced

25 settings, our method recovered up to 85% power loss caused by the standard method.  
26 We further showed the power gain of our method in gene-level association studies with  
27 26 unbalanced real studies of Age-related Macular Degeneration (AMD). In addition, we  
28 took the meta-analysis of three studies of type 2 diabetes (T2D) as an example to  
29 discuss the challenges of meta-analyzing multi-ethnic samples. In summary, we propose  
30 improved single-variant score statistics in meta-analysis, requiring “accurate” population-  
31 specific MAFs for multi-ethnic studies. These improved score statistics can be used to  
32 construct both single-variant and gene-level association studies, providing a useful  
33 framework for ensuring well-powered, convenient, cross-study analyses.

34

35 **Keywords:** meta-analysis; score statistics; unbalanced setting; population  
36 stratification; single-variant association study; gene-level association study; multi-ethnic;  
37 minor allele frequency

38

## 39 **Introduction**

40 Meta-analysis is now an essential tool for genetic association studies, allowing these to  
41 combine information on 100,000s – 1,000,000s of samples, and greatly accelerating the  
42 pace of genetic discovery. Under ideal experiment settings, e.g., the same case-control  
43 ratio for all individual studies, the standard meta-analysis methods perform as efficiently  
44 as the more cumbersome alternative of sharing individual-level data<sup>1</sup>. Standard meta-  
45 analysis methods have been routinely used in many large-scale genome-wide  
46 association studies (GWASs), identifying many complex trait loci, e.g., type 2 diabetes  
47 (T2D)<sup>2-4</sup>, lipid levels<sup>5</sup>, body mass index (BMI)<sup>6</sup>, rheumatoid arthritis<sup>7</sup>, and fasting glucose  
48 levels<sup>8</sup>. Many tools implementing standard meta-analysis methods have been proposed

49 for both single-variant and gene-level association studies, such as METAL for single-  
50 variant association studies<sup>9</sup>, META-SKAT, MASS, and RAREMETAL for gene-level  
51 association studies<sup>10-13</sup>.

52 However, when the case-control ratios (or phenotype means and variances for  
53 quantitative traits) vary among individual studies due to unbalanced study designs (e.g.,  
54 studies using Biobank<sup>14</sup> data), the current standard meta-analysis methods result in  
55 substantial power loss. The limitations of current standard methods apply where meta-  
56 analysis is based on combining sample sizes and p values (the Stouffer method<sup>15</sup>), using  
57 regression coefficients and their standard errors (the Cochran method<sup>16</sup>), or by  
58 combining score statistics<sup>10</sup>. Although weighting by effective sample sizes of individual  
59 studies may improve the power for single-variant meta-analysis using the Stouffer and  
60 Cochran methods<sup>9</sup>, the weighting strategy will fail for gene-level meta-analysis based on  
61 score statistics. This is because the magnitudes of score statistics are in the order of  
62 sample sizes (unlike the unit-free test statistics used by the Stouffer and Cochran  
63 methods). We note that the standard meta-analysis methods based on score statistics<sup>10</sup>;  
64 <sup>13</sup> ignores the between-study variances of both phenotype and genotype by directly  
65 summing within-study score statistics to approximate the “joint” score statistics. This will  
66 cause power loss when the between-study variances contain association information as  
67 in the scenario of unbalanced studies.

68 Here, we describe a novel meta-analysis method that models the between-study  
69 variances, thus improving power under unbalanced settings. Our method is suitable for  
70 both linear and logistic regression models, with and without covariates. When the study  
71 samples are of the same population (i.e., without population stratification), our method is  
72 equivalent to the more cumbersome joint analysis (i.e., golden standards). For studies  
73 with population stratification, where joint analysis is expected to cause inflated false

74 positive rates, we propose a novel approach to adjust for population stratification using  
75 known population structure information, i.e., population-specific minor allele frequencies  
76 (MAFs). Observing that population stratification is reflected by MAFs in the score  
77 statistics, we adjust population stratification by regressing out the effects of population-  
78 specific MAFs (obtainable from reference panels such as 1000 Genome<sup>17</sup>, or  
79 Biobanks<sup>14</sup>) from within-study MAFs. This approach aims to adjust for the between-study  
80 variations due to population stratification, which can be implemented as a  
81 complementary step of adjusting for first few principle components (PCs) within  
82 individual studies<sup>18</sup> (adjusting for the within-study population stratification). Although our  
83 approach applies to any meta-analysis methods based on score statistics, we focus on  
84 single-variant score tests<sup>19</sup>, and further extend to enable gene-level Burden<sup>20; 21</sup> test and  
85 sequential kernel association test (SKAT)<sup>22</sup>.

86 By simulation studies, we showed that, under unbalanced settings, our method  
87 recovered up to 84% power loss caused by the standard methods while controlling for  
88 false positive rates (i.e., type I errors), regardless of the existence of population  
89 stratification. Further, we demonstrated the power gain of our method in the real gene-  
90 level association studies of Age-related Macular Degeneration (AMD)<sup>23</sup>, consisted of 26  
91 unbalanced individual studies and 33,976 unrelated European samples (Table S1). For  
92 example, the known AMD risk gene *CFI* has SKAT p value  $1.9 \times 10^{-10}$  by joint analysis,  
93 p value  $1.2 \times 10^{-4}$  by the standard meta-SKAT, and p value  $3.1 \times 10^{-9}$  by our meta-SKAT.  
94 In addition, we applied our method on the meta-analysis of three studies of type 2  
95 diabetes (T2D) with Finnish and American European populations. We noticed that the  
96 standard methods were desirable when the between-study variances contain non-  
97 association variances that can not be completely corrected for, such as when individual

98 studies use different metrics for phenotypes and covariates, or when the population-  
99 specific MAFs are unavailable or “inaccurate”.

100 In summary, we propose improved single-variant score statistics for meta-  
101 analysis to achieve the same performance as the joint analysis under general settings.  
102 These improved single-variant score statistics can be used for both single-variant  
103 association studies and combined to conduct gene-level association studies. Our  
104 method provides a useful framework for ensuring well-powered, convenient, cross-study  
105 analyses and is now implemented in the RAREMETAL software.

106

## 107 **Material and Methods**

### 108 **Score Statistics for Individual Studies**

109 Consider conducting meta-analysis with  $K$  studies, where the  $k$ th study has  $n_k$  samples  
110 genotyped at  $m_k$  variants. Let  $\mathbf{y}_k$  denote the  $n_k \times 1$  phenotype vector;  $\mathbf{X}_k$  denote the  
111  $n_k \times m_k$  genotype matrix, encoding the minor allele count per individual per variant as  
112  $(0, 1, 2)$ ; and  $\mathbf{C}_k$  denote the  $n_k \times (q_k + 1)$  augmented covariate matrix with the first column  
113 set to 1's and the others encoding  $q_k$  covariates. For each individual study, we consider  
114 the standard linear regression model (Equation 1) for quantitative traits

$$115 \quad \mathbf{y}_{ki} = \mathbf{C}_{ki}\boldsymbol{\alpha}_k + \mathbf{X}_{ki}\boldsymbol{\beta}_k + \epsilon_i, \quad \epsilon_i \sim N(\mathbf{0}, \sigma_k^2), \quad i = 1, \dots, n_k, \quad \text{Equation 1}$$

116 and the standard logistic regression model (Equation 2) for dichotomous traits

$$117 \quad \text{logit}(\text{Prob}(\mathbf{y}_{ki} = 1)) = \mathbf{C}_{ki}\boldsymbol{\alpha}_k + \mathbf{X}_{ki}\boldsymbol{\beta}_k, \quad \text{Equation 2}$$

118 where  $\mathbf{X}_{ki}$  is the  $i$ th row of genotype matrix  $\mathbf{X}_k$ ,  $\boldsymbol{\beta}_k$  is the vector of genetic effect-sizes,  
119  $\mathbf{C}_{ki}$  is the  $i$ th row of augmented covariate matrix  $\mathbf{C}_k$ , and  $\boldsymbol{\alpha}_k$  is the vector of covariate

120 effects including the intercept term. Let  $\mathbf{u}_k$  denote the vector of score statistics for the  
121  $k$ th study and  $\mathbf{V}_k$  denote the variance-covariance matrix of  $\mathbf{u}_k$  (Appendix A).

122

### 123 **Standard Meta-analysis**

124 For notation simplicity, we assume all  $K$  studies measure the same set of variants, with  
125 phenotypes from the same underlying distribution. The current standard meta-analysis  
126 methods typically approximate the joint score statistics (obtainable by joint analysis) by

$$127 \quad \mathbf{u} = \sum_{k=1}^K \mathbf{u}_k, \quad \mathbf{V} = \sum_{k=1}^K \mathbf{V}_k. \quad \text{Equation 3}$$

128 Under unbalanced studies, these statistics will be systematically different from those  
129 obtained from the joint analysis using combined individual-level data – potentially leading  
130 to substantial power loss. Instead, we derive our improved approximations for these joint  
131 score statistics  $(\mathbf{u}, \mathbf{V})$  directly from the statistic formulas using combined data as in joint  
132 analysis.

133

### 134 **Simplified Case without Covariates**

135 First, we consider a simplified case without covariates, in which the following analytical  
136 formulas (Equations 4 and 5) are derived for joint score statistics under both linear and  
137 logistic regression models (Appendix B.1), in terms of the within-study score statistics  
138  $(\mathbf{u}_k, \mathbf{V}_k)$ , sample size  $n_k$ , phenotype mean deviation  $\delta_k$ , residual variance estimate  $\widehat{\sigma}_k^2$ ,  
139 and MAF vector  $\mathbf{f}_k$ ,

$$140 \quad \mathbf{u} = \sum_{k=1}^K \mathbf{u}_k + \sum_{k=1}^K 2n_k \delta_k (\mathbf{f} - \mathbf{f}_k), \quad \text{Equation 4}$$

$$141 \quad \mathbf{V} = \widehat{\sigma}^2 \left[ \sum_{k=1}^K \begin{bmatrix} \mathbf{V}_k \\ \widehat{\sigma}_k^2 \end{bmatrix} - \sum_{k=1}^K 4n_k (\mathbf{f}\mathbf{f}' - \mathbf{f}_k \mathbf{f}_k') \right]. \quad \text{Equation 5}$$

142 Here,  $\delta_k = \left(\frac{1}{n} \sum_{k=1}^K n_k \bar{y}_k\right) - \bar{y}_k$  denotes the difference between the overall phenotype  
143 mean and within-study phenotype mean;  $\widetilde{\sigma}^2 = \frac{1}{n-1} \sum_{k=1}^K \left[ (n_k - 1) \widehat{\sigma}_k^2 + n_k \delta_k^2 \right]$  denotes the  
144 joint residual variance; and  $\mathbf{f} = \frac{\sum_{k=1}^K n_k \mathbf{f}_k}{\sum_{k=1}^K n_k}$  denotes the overall MAF vector. The key  
145 difference from the standard approach (Equation 3) is that we actually model the  
146 between-study variations (second terms in Equations 4 and 5) through the phenotype  
147 mean deviation  $\delta_k$ , residual variance difference between  $\widehat{\sigma}_k^2$  and  $\widetilde{\sigma}^2$ , and MAF difference  
148 between  $\mathbf{f}_k$  and  $\mathbf{f}$ .

149 We note that, when the studies are balanced with samples of the same  
150 population, i.e.,  $\delta_k = 0$ ,  $\widehat{\sigma}_k^2 \approx \widetilde{\sigma}^2$ ,  $\mathbf{f}_k \approx \mathbf{f}$ , Equations 4 and 5 are equivalent to the  
151 standard estimates in Equation 3 and equivalent to the joint estimates. This is why the  
152 standard meta-analysis methods perform as efficient as joint analysis in balanced  
153 studies with samples of the same population. However, when the studies are  
154 unbalanced (e.g., with case-control ratios differ greatly among studies), i.e.,  $\delta_k \neq 0$ ,  $\widehat{\sigma}_k^2 \neq$   
155  $\widetilde{\sigma}^2$ ,  $\mathbf{f}_k \neq \mathbf{f}$ , the standard estimates (Equation 3) can no longer accurately approximate  
156 the joint score statistics, potentially leading to substantial power loss. In contrast, our  
157 meta-analysis method (using Equations 4 and 5) will be equivalent to joint analysis  
158 under general settings.

159

## 160 **General Case with Covariates**

161 Second, we consider the general case with covariates in which the joint score statistic  $\mathbf{u}$   
162 is still given by Equation 4, but the formula for the joint variance-covariance matrix  $\mathbf{V}$  will  
163 be different from Equation 5. In this case, we approximate the phenotype mean deviation

164 by  $\delta_k \approx \left(\frac{1}{n} \sum_{k=1}^K (n_k \overline{\mu_k})\right) - \overline{\mu_k}$ , where  $\overline{\mu_k} = \frac{1}{n_k} \sum_{i=1}^{n_k} \widehat{\mu_{ki}}$  is the average of the fitted  
 165 phenotypes in study  $k$  under the null regression models with  $\beta = 0$  (Equations 1 and 2).

166 For notation simplicity, we assume all individual studies have the same set of  
 167 covariates. Then under the linear regression model (Equation 1), we can estimate  $V$  by

$$168 \quad V \approx \widetilde{\sigma}^2 \left( \sum_{k=1}^K \frac{V_k}{\widetilde{\sigma}_k^2} + \sum_{k=1}^K (X'_k C_k (C'_k C_k)^{-1} C'_k X_k) \right. \\
 169 \quad \left. - \left( \sum_{k=1}^K X'_k C_k \right) \left( \sum_{k=1}^K C'_k C_k \right)^{-1} \left( \sum_{k=1}^K X'_k C_k \right)' \right), \quad \text{Equation 6}$$

170 where the quantities of the covariate relationship matrix  $C'_k C_k$  and genotype-covariate  
 171 relationship matrix  $X'_k C_k$  need to be shared (Appendix B.2).

172 Under the logistic regression model (Equation 2),  $V$  can be estimated by

$$173 \quad V \approx \sum_{k=1}^K V_k + \sum_{k=1}^K \Delta_k X'_k X_k + \sum_{k=1}^K (X'_k \widehat{P}_k C_k) (C'_k \widehat{P}_k C_k)^{-1} (X'_k \widehat{P}_k C_k)' - \left( \sum_{k=1}^K (X'_k \widehat{P}_k C_k + \right. \\
 174 \quad \left. \Delta_k X'_k C_k) \right) \left( \sum_{k=1}^K (C'_k \widehat{P}_k C_k + \Delta_k C'_k C_k) \right)^{-1} \left( \sum_{k=1}^K (X'_k \widehat{P}_k C_k + \Delta_k X'_k C_k) \right)', \quad \text{Equation 7}$$

175 where  $\widehat{P}_k = \text{diag}(\widehat{\mu}_{k1}(1 - \widehat{\mu}_{k1}), \dots, \widehat{\mu}_{kn_k}(1 - \widehat{\mu}_{kn_k}))$  denotes the diagonal matrix of  
 176 phenotypic variances after correcting for within-study covariates;  $\Delta_k = \delta_k(1 - 2\overline{\mu_k} - \delta_k)$   
 177 is the average difference between  $\widehat{P}_k$  and an analogous estimate in joint analysis. To  
 178 enable the calculation by Equation 7, the quantities of the genotype relation matrix  $X'_k X_k$ ,  
 179 covariate relation matrices  $(C'_k C_k, C'_k \widehat{P}_k C_k)$ , and the genotype-covariate relation matrices  
 180  $(X'_k C_k, X'_k \widehat{P}_k C_k)$  need to be shared (Appendix B.2).

181

## 182 **Adjusting for Population Stratification**

183 Because our score statistic formulas (Equations 4-7) are equivalent to the analogous  
 184 statistics obtainable in joint analysis, the meta-analysis using our score statistic



185 estimates is likely to subject to inflated false positive rates (as joint analysis) when  
 186 studies are of multi-ethnic. We note that the population stratification is reflected by the  
 187 between–study variances, particularly by the differences between within-study MAFs  
 188 and the joint MAFs, i.e.,  $(f - f_k)$  in Equation 4 and  $(ff' - f_k f_k')$  in Equation 5. The  
 189 standard meta-analysis methods using Equation 3 fail to model the between-study  
 190 variances (free of population stratification), for dropping the second terms in Equations 4  
 191 and 5. Therefore, when population stratification exists in the combined data, we have to  
 192 adjust our score statistic estimates (by Equations 4 and 5) to correct for inflated false  
 193 positive rates.

194 Here, we propose to normalize our within-study MAFs by regressing out the  
 195 population effects that can be explained by known population-specific MAFs (e.g.,  
 196 population MAFs from reference panels like 1000 Genome Project<sup>17</sup>, or Biobanks<sup>14</sup>). For  
 197 example, with known MAF vectors  $f_{EUR}, f_{AMR}, f_{AFR}, f_{SAS}, f_{EAS}$  of genome-wide variants  
 198 for European, American, African, South Asian, and East Asian populations in the 1000  
 199 Genome Project<sup>17</sup>, we first fit the following linear regression model per individual study  
 200 using the MAFs of genome-wide variants in the reference panel

$$201 \quad f_k = \sum \gamma_{pop} f_{pop} + \varepsilon, \quad pop \in (EUR, AMR, AFR, SAS, EAS).$$

202 Then, in Equations 4 and 5, we substitute  $f_k$  by the residuals  $\tilde{\xi}_k = f_k - \sum \widehat{\gamma}_{pop} f_{pop}$ , and  
 203  $f$  by the weighted residual averages  $\frac{\sum_{k=1}^K n_k \tilde{\xi}_k}{\sum_{k=1}^K n_k}$ . We set the corresponding elements in  
 204 vectors  $f_k$  and  $f$  as 0 for variants absent from the reference panel or with fitted values  
 205 outside of the 95% predictive intervals, such that the between-study variances related to  
 206 these variants will not be modeled in our method. Equivalently, in Equations 6 and 7, we  
 207 can normalize the genotype matrix by  $\tilde{X} = X - 2(\sum \widehat{\gamma}_{pop} f_{pop})J'$  for variants in the

208 reference panel, while set the genotype matrix as 0 for variants with unknown  
209 population-specific MAFs or with outlying fitted values.

210

## 211 **Practical Approach**

212 Although Equations 6 and 7 enable joint-equivalent corrections for covariates in meta-  
213 analysis, they are not directly applicable in practice for the difficulties of sharing the  
214 quantities of  $X'_k X_k$ ,  $(C'_k C_k, C'_k \widehat{P}_k C_k)$ , and  $(X'_k C_k, X'_k \widehat{P}_k C_k)$ . Thus, for computational  
215 simplicity, we suggest using Equation 5 with phenotypes corrected for covariates within  
216 individual studies under the linear regression model (Equation 1), where the  
217 dichotomous traits could be treated as quantitative traits by coding cases as 1's and  
218 controls as 0's. The RAREMETAL software also implements this practical approach.  
219 Both approaches (Equations 6 and 7 vs. Equation 5) produced nearly the same  
220 association results in our simulations. For both quantitative and dichotomous studies in  
221 this paper, we first corrected phenotypes within studies, and then used score statistic  
222 estimates by Equations 4 and 5 for association studies (adjusting for possible population  
223 stratification).

224 One key point of conducting joint-equivalent meta-analysis by our method is to  
225 include the intercepts from covariate correction into the corrected phenotypes, for  
226 modeling the between-study variances due to phenotype mean deviations. Otherwise,  
227 the phenotype deviation  $\delta_k$ 's will all be 0's, and our score statistic estimates (Equation 4)  
228 will be equivalent to the standard estimates (Equation 3). Another key point is to make  
229 sure phenotype deviation  $\delta_k$ 's contain no other artificial effects (e.g., batch effects,  
230 effects due to different metrics or different underlying distributions across studies for  
231 phenotypes), which is likely to inflate the false positive rates.

232

## 233 Test Statistics

234 Our meta-analysis methods are based on accurately approximating the joint score  
235 statistics ( $\mathbf{u}$ ,  $\mathbf{V}$ ), and properly adjusting for possible population stratification. We consider  
236 the Burden test<sup>20</sup> with statistic  $Q_{Burden} = \frac{(\mathbf{w}'\mathbf{u})^2}{\mathbf{w}'\mathbf{V}\mathbf{w}}$  and SKAT<sup>10</sup> with statistic  $Q_{SKAT} = \mathbf{u}'\mathbf{W}^2\mathbf{u}$   
237 as examples of gene-level tests, where  $\mathbf{w}' = (w_1, \dots, w_m)$  is the variant-specific weight  
238 vector, and  $\mathbf{W} = \text{diag}(w_1, \dots, w_m)$  is the  $m \times m$  diagonal matrix. For each variant, we take  
239 the weight as “capped” beta density value  $w_j = CBeta(f_j; 0.5, 0.5)$  with the corresponding  
240 MAF  $f_j$ , to avoid assigning extremely large weights for extremely rare variants  
241 ( $Beta(f_j; 0.5, 0.5) \rightarrow \infty$  as  $f_j \rightarrow 0$ ). That is, with sample size  $n$ ,  $CBeta(f_j; 0.5, 0.5) =$   
242  $Beta(\frac{5}{2n}; 0.5, 0.5)$  if the minor allele count  $2nf_j < 5$ , otherwise  $CBeta(f_j; 0.5, 0.5) =$   
243  $Beta(f_j; 0.5, 0.5)$  allowing equal variance contributions from all variants.

244 Under the null hypothesis ( $H_0: \boldsymbol{\beta} = \mathbf{0}$ ), both  $Q_{Burden}$  and the the single-variant  
245 score test with statistic  $Q_{score} = \frac{\mathbf{u}^2}{\mathbf{V}}$  (here  $m = 1$ ) follow a chi-square distribution with 1  
246 degree of freedom ( $df = 1$ ). Under the equivalent null hypothesis  $E(\beta_j) = 0, Var(\beta_j) =$   
247  $w_j^2\tau, j = 1, \dots, m; \tau = 0$ ) for SKAT,  $Q_{SKAT}$  asymptotically follows a mixture of chi-square  
248 distributions,  $\sum_{j=1}^m \lambda_j \chi_{j, df=1}^2$ , where  $(\chi_{j, df=1}^2)$  are independent chi-square random  
249 variables with  $df = 1$ , and  $\lambda_j$ 's are nonzero eigenvalues of the variant relationship matrix  
250  $\boldsymbol{\Phi} = \mathbf{W}\mathbf{V}\mathbf{W}$ .

251

## 252 Simulation Studies

253 To evaluate the false positive rate (type I error) and power of our meta-analysis method,  
254 we conducted simulation studies in various scenarios with balanced and unbalanced

255 studies, with and without population stratification, with quantitative and dichotomous  
256 traits (see details of the simulation setup in Appendix C).

257 Briefly, we first simulated haplotypes of three populations (European (EUR),  
258 Asian (ASA), and African (AFR)) by COSI with the well calibrated coalescent model<sup>24</sup>.  
259 Then we sampled genotypes of  $1 \times 10^5$  individuals per population with 339 variants, 96%  
260 of which have MAFs <5%. Random risk regions of 100 variants were selected to  
261 simulate both quantitative and dichotomous phenotypes, according to the standard linear  
262 and logistic models. We simulated phenotypes under the null models ( $\beta = \mathbf{0}$ ) for  
263 evaluating the empirical type I error, and phenotypes with half of the variants in the risk  
264 regions as true causals for evaluating the power.

265 We considered meta-analysis with 5 individual studies and a total sample size  
266 3,000 (Table S2), under combined scenarios of dichotomous and quantitative traits,  
267 balanced and unbalanced settings, common and uncommon covariates, single and  
268 multiple ethnic samples. For the balanced scenarios, each dichotomous study has 300  
269 cases and 300 controls, while each quantitative study has 600 samples. For unbalanced  
270 dichotomous studies, there are (60, 180, 300, 420, 540) cases and (540, 420, 300, 180,  
271 60) controls, such that the individual studies have the same sample size but various  
272 cases-control ratios. Unbalanced quantitative studies have sample sizes (200, 400, 600,  
273 800, 1000). Two covariate scenarios were simulated: (i) common covariates for all  
274 studies; (ii) different covariates among studies.

275 For the case with single-ethnic samples (i.e., without population stratification), we  
276 compared our adjusted meta-analysis methods with the standard methods and the joint  
277 analysis, where the results by joint analysis will serve as the golden standards. For the  
278 case with multi-ethnic samples (i.e., with population stratification; with EUR samples in  
279 studies 1 and 3, ASA samples in studies 2 and 4, and AFR samples in study 5), we only

280 considered balanced and unbalanced dichotomous studies with common covariates  
281 (Table S2). In this case, we corrected the population stratification using the population  
282 MAF vectors ( $f_{EUR}, f_{ASA}, f_{AFR}$ ) that were calculated from  $1 \times 10^5$  samples of the  
283 respective population. We compared our methods with the standard methods and joint  
284 analysis with first 4 principle components (PCs) as additional covariates.

285

## 286 **AMD and T2D Data**

287 The study of age-related macular degeneration (AMD) by the International AMD  
288 Genomics Consortium (IAMGDC)<sup>23</sup> consists of 26 individual studies with 33,976  
289 European, 1,572 Asian, and 413 African unrelated samples. Variants were genotyped on  
290 a customized Exome-Chip and imputed against the 1000 Genome Project Phase I  
291 reference panel. Advanced AMD cases include both cases with choroidal  
292 neovascularization and cases with geographic atrophy<sup>23; 25</sup>.

293 Three GWASs of type 2 diabetes (T2D) were considered in this paper: the  
294 Finland-United States Investigation of NIDDM genetics (FUSION) study<sup>2</sup>, METabolic  
295 Syndrome In Men (METSIM) study<sup>26</sup>, and Michigan Genomics Initiative (MGI) study. We  
296 analyzed 2,297 unrelated Finnish samples (1,142 cases vs. 1,155 controls) in FUSION,  
297 3,340 unrelated Finnish samples (673 cases vs. 2,667 controls) in METSIM, and 16,495  
298 unrelated European American samples (1,942 cases vs. 14,553 controls) in MGI.

299 For the association studies of both AMD and T2D, all participants gave informed  
300 consent and the University of Michigan IRB approved our analyses.

301

## 302 **Results**

### 303 **Empirical Type I Errors in Simulation Studies**

304 We repeated  $2.5 \times 10^7$  null simulations per scenario to obtain empirical type I errors with  
305 significance levels  $\alpha = 10^{-2}, 10^{-4}, 2.5 \times 10^{-6}$ . We showed that both Burden test and  
306 SKAT — by our adjusted meta-analysis method, the standard method, and joint analysis  
307 — controlled well for type I errors in all scenarios without population stratification (Figure  
308 1A; Figures S2 and S3).

309 In the scenarios with population stratification, we showed that both Burden test  
310 and SKAT by our method and the standard method still controlled well for type I errors  
311 (Figure 1B; Figures S4 and S5(C, D, E, F)), while the tests by joint analysis with first 4  
312 joint PCs as additional covariates had highly inflated type I errors (see Quantile-Quantile  
313 (QQ) plots of  $-\log_{10}(p \text{ values})$  in Figure S5(A, B)). This demonstrated that the standard  
314 methods were not affected by population stratification, and that our approach of  
315 adjusting for population stratification successfully corrected for inflated type I errors.

316

### 317 **Empirical Power in Simulation Studies**

318 For each scenario, we repeated 10,000 simulations to obtain the empirical power that is  
319 given by the proportion of simulations with p values  $< 2.5 \times 10^{-6}$  (genome-wide  
320 significance level for gene-level association tests). Here, our goal is to compare the  
321 power of our adjusted meta-analysis method with the standard method and the joint  
322 analysis. The power differences between Burden test and SKAT will depend on  
323 simulation settings.

324 In the balanced dichotomous studies without population stratification, both  
325 standard and our adjusted estimates of joint score statistics (by Equation 4) were highly  
326 concordant with the golden standards obtained by joint analysis ( $R^2 > 99.8\%$ ; Figure 2(A,  
327 B)). In the unbalanced dichotomous studies, the standard meta estimates of score

328 statistics (by Equation 3) scattered further from the joint score statistics ( $R^2 \sim 78.2\%$ ,  
329 Figure 2C), while our adjusted estimates were still concordant with the joint score  
330 statistics ( $R^2 > 99.8\%$ ; Figure 2D). Consequently, under balanced settings, the p values  
331 of single-variant score tests by both standard methods and our adjusted methods were  
332 concordant with the joint analysis results (Figure 2(E, F)). However, under unbalanced  
333 settings, the p values by standard methods were less significant than joint analysis  
334 results (Figure 2G), hence less significant than the results by our adjusted methods that  
335 were concordant with the joint analysis results (Figure 2H).

336         With more accurate estimation for the joint score statistics, the gene-level tests  
337 (i.e., Burden test and SKAT based on score statistics) by our adjusted meta-analysis  
338 method are equivalent to joint analyses. This is the fundamental reason why our method  
339 performs as efficiently as the joint analysis under general settings, recovering up to 69%  
340 power loss caused by the standard method in unbalanced dichotomous studies with  
341 common covariates (Figure 3). Similar results were obtained for scenarios with different  
342 covariates (Figures S6-S8). Take the dichotomous studies with common covariates for  
343 examples (Figure 3), the power by standard meta-analysis method was 0.701 for Burden  
344 and 0.219 for SKAT, which were 27% and 69% less than the golden standards (0.964  
345 for Burden; 0.703 for SKAT) by joint analysis (without population stratification); while the  
346 results by our adjusted meta-analysis method (power 0.964 for Burden; 0.702 for SKAT)  
347 were concordant with the joint analysis results.

348         In the scenarios with population stratification, the joint analysis (with top 4 PCs as  
349 additional covariates) no longer provide golden standards due to highly inflated type I  
350 errors (see QQ plots of  $-\log_{10}(p \text{ values})$  in Figure S5(A, B)). Hence, we only compared  
351 the empirical powers by our adjusted meta-analysis method with the standard method.  
352 Again, both methods had similar power in balanced dichotomous studies, while our

353 adjusted meta-analysis method recovered up to 85% power loss by the standard method  
354 in unbalanced dichotomous studies (0.898 vs. 0.302 for Burden test, Figure 3C; 0.880  
355 vs. 0.126 for SKAT, Figure 3D).

356 For quantitative studies, although we simulated “unbalanced” scenarios with  
357 various sample sizes, these are not really unbalanced for having about the same  
358 phenotype means across individual studies (i.e., the between study variances were  
359 close to 0). As a result, both our adjusted method and the standard method produced  
360 equivalent results as joint analyses under all settings (Figure S9-S13).

361 In summary, the simulations showed that our adjusted meta-analysis method will  
362 improve power by correctly modeling the association information in the between-study  
363 variances. When the between-study variances are close to 0 as under balanced settings,  
364 both our method and the standard method are equivalent to the joint analysis. When the  
365 between-study variances are also subject to population stratification, our method require  
366 good reference panels to correct for possibly inflated type I errors.

367

### 368 **Real Study of AMD**

369 We applied our method on the real AMD data collected by the International AMD  
370 Genomics Consortium (IAMGDC)<sup>23</sup>, which has 26 individual studies with 33,976  
371 European, 1,572 Asian, and 413 African unrelated samples. We treated the Asian and  
372 African samples as two extra studies. First, we conducted null simulations for  $2.5 \times 10^7$   
373 times using the AMD data, by permuting the real AMD phenotypes and randomly  
374 selecting genotype regions of 100 variants for Burden test and SKAT. We found that  
375 both our adjusted and the standard meta-analysis methods controlled well for type I  
376 errors, while joint analyses with first 4 joint PCs as extra covariates resulted inflated type



377 I errors (Figure S14). Specifically, with significance level  $2.5 \times 10^{-6}$ , the joint analyses  
378 (Joint\_PC4) had type I errors  $8.6 \times 10^{-6}$  for Burden test and  $9.2 \times 10^{-6}$  for SKAT.

379 For valid comparisons with joint analyses, we only considered European samples  
380 from the 26 unbalanced studies (Table S1) for Burden test and SKAT in 3 example AMD  
381 risk genes<sup>23</sup> (*CFH*, *CFI*, *TIMP3*). Previous analyses by variable-threshold tests<sup>27</sup> (with  
382 respective MAF thresholds 0.015%, 0.068%, 0.021% for genes *CFH*, *CFI*, *TIMP3*) gave  
383 significant p values ( $< 2.5 \times 10^{-6}$ ) for these 3 loci. To be consistent with the previous  
384 variable-threshold tests<sup>27</sup>, we only analyzed protein-altering variants  
385 (imputed/genotyped) with MAFs under the corresponding thresholds (MAFs  $< 0.015\%$ ,  
386 0.068%, 0.021%), and corrected for the same covariates — known independent  
387 signals within the same locus, gender, first two principal components (calculated using  
388 the combined data), and source of DNA (whole-blood or whole genome-amplified DNA).

389 Our adjusted meta-analysis method produced genome-wide significant p values  
390 for genes *CFH* and *CFI* (Table 1), which were more significant than the ones by the  
391 standard method. Specifically, gene *CFH* had genome-wide significant Burden p value  
392  $2.4 \times 10^{-7}$  by joint analysis, versus  $2.1 \times 10^{-6}$  by our adjusted meta-analysis method and  
393  $3.2 \times 10^{-5}$  by the standard method (no longer genome-wide significant). Although all  
394 methods obtained significant Burden p values for gene *CFI*, the p value by our method  
395 was still more significant than the one by the standard method ( $3.3 \times 10^{-14}$  vs.  $9.6 \times$   
396  $10^{-10}$ ) and closer to the p value by joint analysis ( $8.9 \times 10^{-15}$ ). Similarly, the SKAT p  
397 value by standard method for gene *CFI* was no longer genome-wide significant ( $1.2 \times$   
398  $10^{-4}$ ), while the SKAT p value by our adjusted method ( $3.1 \times 10^{-9}$ ) was still genome-wide  
399 significant and close to the one by joint analysis ( $1.9 \times 10^{-10}$ ).

400 Even though all approaches failed to identify the *TIMP3* locus with p values  
401  $1.8 \times 10^{-5}$  by joint Burden test and  $2.6 \times 10^{-4}$  by joint SKAT, our method still produced

402 more significant p values than the standard method ( $1.0 \times 10^{-5}$  vs.  $9.8 \times 10^{-4}$  for Burden  
403 test;  $7.4 \times 10^{-5}$  vs.  $2.6 \times 10^{-3}$  for SKAT). Likely due to the meta-analysis errors, the  
404 Burden and SKAT p values for gene *TIMP3* by our method are slightly smaller than the  
405 ones by joint analysis.

406 This real example of AMD study demonstrated that both our method and the  
407 standard method controlled well for type I errors, and that our method outperformed the  
408 standard method by correctly modeling the between-study variances under unbalanced  
409 settings. Here, our method achieved the same power as the joint analysis whose results  
410 serve as golden standards with single-ethnic samples.

411

#### 412 **Real Study of T2D**

413 In this real example, we considered single-variant meta-analyses of three T2D GWASs:  
414 FUSION (1,142 cases vs. 1,155 controls; unrelated Finnish samples)<sup>2</sup>, METSIM (673  
415 cases vs. 2,667 controls; unrelated Finnish male samples)<sup>26</sup>, and MGI (1,942 cases vs.  
416 14,553 controls; unrelated European American samples). These three unbalanced  
417 GWASs have various case-control ratios (0.98, 0.24, 0.13) and multi-ethnic samples  
418 (Figures S15 and S16).

419 We first jointly corrected the T2D phenotypes for age, gender, body mass index  
420 (BMI), and first two joint PCs, within individual studies. The reason of jointly correcting  
421 the T2D phenotypes is to eliminate the possible between-study variance due to the  
422 artificial effects caused by individually corrected phenotypes. Then we applied the joint  
423 analysis, the standard, our joint-equivalent method (without adjustment for population  
424 stratification), and our adjusted meta-analysis method with adjustment for population  
425 stratification using the population-specific MAFs of EUR, AMR, AFR, SAS, EAS from the  
426 1000 Genome Project<sup>17</sup> (~500 samples per population). In the step of adjusting for

427 population by regressing known population-specific effects (MAFs) out from the within-  
428 study MAFs, the regression  $R^2$  was 97.1%, 96.3%, and 99.5% for FUSION, METSIM,  
429 and MGI studies, respectively. This showed that the 1000 Genome<sup>17</sup> might not be the  
430 best reference panel for the FUSION and METSIM studies with Finnish samples, as  
431 >99% regression  $R^2$  is expected for a good reference panel.

432 In this study, we only analyzed 631,870 variants that were genotyped in the  
433 METSIM study as an example. These analyzed variants could be either genotyped or  
434 imputed to 1000 Genome Project<sup>17</sup> or absent in FUSION (627,920 variants) and MGI  
435 (631,628 variants) studies (see Manhattan plots of the individual GWASs in Figure S17).  
436 As expected, the joint analysis and the joint-equivalent methods resulted inflated type I  
437 errors (with inflated genomic control factors,  $\lambda_{GC} = 1.11, 1.13$ ), because the between-  
438 study variances were also subject to population stratification (see QQ plots in Figure S18  
439 (A, C)). The standard meta-analysis method was not affected by the population  
440 stratification for not modeling the between-study variances ( $\lambda_{GC} = 1.07$ , Figure S18 (B)).  
441 Specifically, the standard method identified three known T2D risk loci (*CDKAL1* on  
442 CHR6, *SLC30A8* on CHR8, and *TCF7L2* on CHR10)<sup>28</sup>, while our method with  
443 adjustment for population stratification identified comparable p values for signals in the  
444 *SLC30A8* and *TCF7L2* loci, more significant p value in the *CDKAL1* locus, and one extra  
445 potential loci *ROBO2* on CHR3 (see Manhattan plots in Figure 4).

446 We looked into the within-study MAFs of all “genome-wide significant” variants  
447 that were identified by joint analysis (Figure S19). We found that all “false positive”  
448 signals by joint analysis were likely due to the big differences among the within-study  
449 MAFs, while the “true” signals identified by the standard method have comparable  
450 within-study MAFs. For variants whose population-specific MAFs are “accurate” from the  
451 1000 Genome Project<sup>17</sup>, our adjusted method could correct for the population

452 stratification (i.e., MAF variations due to population differences). However, if the within-  
453 study MAFs were different due to mislabeled minor alleles, genotype errors, and small  
454 sample sizes, our adjusting step is likely to fail. The “inaccurate” population-specific  
455 MAFs from the reference panel and possible “wrong” within-study MAFs could potentially  
456 cause the “inflated” genomic control factor  $\lambda_{GC} = 1.15$  with our adjusted method (Figure  
457 S18 (D)).

458 This real study demonstrated the benefit of improving power by applying our  
459 adjusted meta-analysis method on unbalanced studies. Further, this study showed the  
460 challenges of correctly adjusting for population stratification when samples are of multi-  
461 ethnic. Our method requires “accurate” within-study MAFs and “accurate” population-  
462 specific MAFs from the reference panels. For cases where the adjustment of population  
463 stratification is likely to fail, we suggest using the standard method to be conservative.

464

## 465 **Discussion**

466 In this paper, we propose improved formulas for accurately estimating the joint score  
467 statistics in meta-analysis, which had  $R^2 > 99\%$  with the ones obtainable using individual-  
468 level data under general settings. Consequently, for both single-variant score tests and  
469 gene-level tests based on score statistics (e.g., Burden test and SKAT), our meta-  
470 analysis method performs equivalently as the joint analysis using individual-level data  
471 under general settings. Importantly, our method is applicable for both linear and logistic  
472 regression models, with and without covariates. Both simulations and the real example  
473 of AMD demonstrated that our method performed as efficient as the joint analysis with  
474 unique-ethnic samples, substantially improving power over the standard method in  
475 unbalanced studies with various case-control ratios.

476 We further propose a novel approach to adjust for population stratification when  
477 the combined samples are of multi-ethnics. Observing that the population stratification is  
478 reflected by the differences of within-study MAFs in the score statistic formulas, we  
479 propose to normalize population structures by regressing out the effects of known  
480 population-specific MAFs (obtainable from external reference panels, e.g., 1000  
481 Genome Project<sup>17</sup> and Biobanks) from the within-study MAFs. Simulation studies with  
482 “accurate” population-specific MAFs based on  $10^5$  samples showed the success of  
483 adjusting for population stratification by our adjusted meta-analysis method. This  
484 approach even avoids the dilemma of choosing an appropriate number of PCs as  
485 additional covariates. Both simulation and real studies demonstrated that our adjusted  
486 meta-analysis method controlled well for type I errors in general scenarios and gained  
487 power under unbalanced settings.

488 However, there are limitations about our method. First, our method assumes that  
489 the genetic effects are homogeneous across studies and the phenotypes are of the  
490 same distribution. Second, our method requires that there are no artificial effects  
491 involved in the between-study variances. Third, our method requires “accurate” within-  
492 study MAFs and good reference panel for correctly adjusting for population stratification.  
493 When the between-study variances contain information due to artificial effects or  
494 population stratification, the standard method is preferred for avoiding inflated false  
495 positive rates. Taking the real study of T2D as an example, we discussed the challenges  
496 of correctly adjusting for population stratification in practice.

497 In conclusion, we provide improved score statistic formulas in terms of summary  
498 statistics, for the analogous ones in joint analysis. These score statistics can then be  
499 used to conduct both single-variant and gene-level associations studies. Through these  
500 formulas, we showed that the between-study variances subject to population

501 stratification (various MAFs across populations) are likely to cause inflated type I errors,  
502 and explained why the standard method is free of effects from population stratification.  
503 We further proposed a novel approach for adjusting population stratification using known  
504 population-specific MAFs from reference panels. As a result, our meta-analysis  
505 approach provides a useful framework ensuring well-powered, convenient, cross-study  
506 association analyses.

507

## 508 **Acknowledgments**

509 This work was supported by the National Institutes of Health (NIH) grant R01HG007022.  
510 All authors claim there is no conflict of interest. The authors would like to thank Dr.  
511 Dajiang Liu (Pennsylvania State University), Dr. Shuang Feng (graduated Ph.D. student  
512 from University of Michigan), and Dr. Shawn Lee (University of Michigan) for their  
513 inspiration and valuable comments for this work. Especially, the authors want to thank all  
514 investigators of the IAMDGC, FUSION, METSIM, and MGI studies for providing the real  
515 data of the AMD and T2D studies in this work.

516

## 517 **Web Resources**

518 Software RAREMETAL, <https://github.com/traxexx/Raremetal>.

519

520 **Table 1. P values of gene-level Burden test and SKAT by the standard meta-analysis method, our**  
 521 **adjusted meta-analysis method, and joint analysis.**

| Gene  | Burden Test           |                       |                       | SKAT                 |                      |                       |
|-------|-----------------------|-----------------------|-----------------------|----------------------|----------------------|-----------------------|
|       | Standard              | Adjusted              | Joint                 | Standard             | Adjusted             | Joint                 |
| CFH   | $3.2 \times 10^{-5}$  | $2.1 \times 10^{-6}$  | $2.4 \times 10^{-7}$  | $6.1 \times 10^{-4}$ | $8.4 \times 10^{-5}$ | $3.6 \times 10^{-5}$  |
| CFI   | $9.6 \times 10^{-10}$ | $3.3 \times 10^{-14}$ | $8.9 \times 10^{-15}$ | $1.2 \times 10^{-4}$ | $3.1 \times 10^{-9}$ | $1.9 \times 10^{-10}$ |
| TIMP3 | $9.8 \times 10^{-4}$  | $1.0 \times 10^{-5}$  | $1.8 \times 10^{-5}$  | $2.6 \times 10^{-3}$ | $7.4 \times 10^{-5}$ | $2.6 \times 10^{-4}$  |

522

523

524 **Appendices**

525 **Appendix A: Score Statistics for an individual Study**

526 For the  $k$ th sub-study, denote the mean genotype matrix by  $\overline{X}_k = 2f_k J_k'$ , where  $f_k$   
 527 denotes the within-study MAF vector and  $J_k$  denotes a  $n_k \times 1$  vector of 1's. The score  
 528 statistic vector and corresponding variance-covariance matrix are given by

529 
$$\mathbf{u}_k = (\mathbf{X}_k - \overline{X}_k)'(\mathbf{y}_k - \widehat{\boldsymbol{\mu}}_k), \quad \mathbf{V}_k = \mathbf{X}_k' \left( \widehat{\mathbf{P}}_k - \widehat{\mathbf{P}}_k \mathbf{C}_k (\mathbf{C}_k' \widehat{\mathbf{P}}_k \mathbf{C}_k)^{-1} \mathbf{C}_k' \widehat{\mathbf{P}}_k \right) \mathbf{X}_k,$$

530 where  $\widehat{\boldsymbol{\mu}}_k = (\widehat{\mu}_{k1}, \dots, \widehat{\mu}_{kn_k})' = \mathbf{C}_k \widehat{\boldsymbol{\alpha}}_k$ ,  $\widehat{\mathbf{P}}_k = \widehat{\sigma}_k^2 \mathbf{I}_k$  for quantitative traits under the standard  
 531 linear regression model;  $\widehat{\boldsymbol{\mu}}_k = \text{logit}^{-1}(\mathbf{C}_k \widehat{\boldsymbol{\alpha}}_k) = \frac{1}{1 + e^{-\mathbf{C}_k \widehat{\boldsymbol{\alpha}}_k}}$ ,  $\widehat{\mathbf{P}}_k = \text{diag}(\widehat{\mu}_{k1}(1 -$   
 532  $\widehat{\mu}_{k1}), \dots, \widehat{\mu}_{kn_k}(1 - \widehat{\mu}_{kn_k}))$  for dichotomous traits under the standard logistic regression  
 533 model; coefficient vector  $\widehat{\boldsymbol{\alpha}}_k$  and residual variance  $\widehat{\sigma}_k^2$  are estimated under the null model  
 534 ( $\boldsymbol{\beta}_k = 0$ ); and  $\mathbf{I}_k$  denotes a  $n_k \times n_k$  identity matrix.

535

536 **Appendix B: Score Statistics for Combined Data**

537 For simplicity of notations, assume all  $K$  studies have the same set of genetic variants  
 538 and covariates. Let  $\mathbf{y} = (\mathbf{y}'_1, \dots, \mathbf{y}'_K)'$  denotes the joint  $n \times 1$  phenotype vector of  $K$  studies,  
 539  $n = \sum_{k=1}^K n_k$ ,  $\mathbf{X} = (\mathbf{X}'_1, \dots, \mathbf{X}'_K)'$  denotes the joint  $n \times m$  genotype matrix, and  $\mathbf{C} =$   
 540  $(\mathbf{C}'_1, \dots, \mathbf{C}'_K)'$  denotes the joint  $n \times (q + 1)$  augmented covariate matrix. Denote the overall

541 mean genotype matrix by  $\bar{X} = 2fJ'$ , where  $f$  is the overall MAF vector and  $J$  is a  $n \times 1$   
 542 vector of 1's. With combined data  $(X, y, C)$ , the joint score statistic vector and  
 543 corresponding variance-covariance matrix are given by

$$544 \quad \mathbf{u} = (X - \bar{X})'(y - \tilde{\mu}), \quad \mathbf{V} = X'(\tilde{P} - \tilde{P}C(C'\tilde{P}C)^{-1}C'\tilde{P})X,$$

545 where  $\tilde{\mu} = C\tilde{\alpha}$ ,  $\tilde{P} = \tilde{\sigma}^2 I_n$  for quantitative traits under the standard linear regression  
 546 model;  $\tilde{\mu} = (\tilde{\mu}_1, \dots, \tilde{\mu}_n)' = \text{logit}^{-1}(C\tilde{\alpha}) = 1/(1 + e^{-C\tilde{\alpha}})$ ,  $\tilde{P} = \text{diag}(\tilde{\mu}_1(1 - \tilde{\mu}_1), \dots, \tilde{\mu}_n(1 -$   
 547  $\tilde{\mu}_n))$  for dichotomous traits under the standard logistic regression model; coefficient  
 548 vector  $\tilde{\alpha}$  and residual variance  $\tilde{\sigma}^2$  are estimated under the null model ( $\beta = 0$ );  $I_n$   
 549 denotes a  $n \times n$  identity matrix.

550

### 551 **Appendix B.1: Score Statistics for the Simplified Case without Covariates**

552 Without covariates, for both quantitative and dichotomous traits, we have within-study  
 553 phenotype mean  $\widehat{\mu}_k = \bar{y}_k = \frac{1}{n_k} \sum_{i=1}^{n_k} y_{ki}$ ; overall phenotype mean  $\tilde{\mu} = \bar{y} = \frac{1}{n} \sum_{k=1}^K n_k \bar{y}_k$ ;  
 554 phenotype deviation  $\delta_k = \bar{y} - \bar{y}_k$ ; and  $\tilde{\mu} = \widehat{\mu}_k + \delta_k$ . Note that  $\bar{X}_k = 2f_k J_k'$  and  $\bar{X} = 2fJ'$ .

555 The joint score statistic vector is given by

$$556 \quad \mathbf{u} = \sum_{k=1}^K (X_k - \bar{X})'(y_k - \tilde{\mu}J_k) = \sum_{k=1}^K [(X_k - \bar{X}_k) - (\bar{X} - \bar{X}_k)]'[(y_k - \widehat{\mu}_k J_k) - \delta_k J_k]$$

$$557 \quad = \sum_{k=1}^K [(X_k - \bar{X}_k)'(y_k - \widehat{\mu}_k J_k) - (\bar{X} - \bar{X}_k)'(y_k - \widehat{\mu}_k J_k) - (X_k - \bar{X}_k)'\delta_k J_k + (\bar{X} - \bar{X}_k)'\delta_k J_k]$$

$$558 \quad = \sum_{k=1}^K [(X_k - \bar{X}_k)'(y_k - \widehat{\mu}_k J_k) + (\bar{X} - \bar{X}_k)'\delta_k J_k]$$

$$559 \quad = \sum_{k=1}^K (X_k - \bar{X}_k)'(y_k - \widehat{\mu}_k J_k) + \sum_{k=1}^K 2n_k \delta_k (f - f_k) = \sum_{k=1}^K \mathbf{u}_k + \sum_{k=1}^K 2n_k \delta_k (f - f_k),$$

560 where  $J_k'J_k = n_k$ ,  $(\bar{X} - \bar{X}_k)'(y_k - \widehat{\mu}_k J_k) = 2(f - f_k) (J_k'y_k - \widehat{\mu}_k J_k'J_k) = \mathbf{0}$ , and



561  $(\mathbf{X}_k - \bar{\mathbf{X}}_k)' \delta_k \mathbf{J}_k = \delta_k (\mathbf{X}'_k \mathbf{J}_k - \bar{\mathbf{X}}_k \mathbf{J}_k) = \mathbf{0}.$

562 Because  $\mathbf{C}_k = \mathbf{J}_k$  in the case without covariates, the covariance matrix of the score  
563 statistic can be simplified as

564 
$$\mathbf{V}_k = \widehat{\sigma}_k^2 [\mathbf{X}'_k \mathbf{X}_k - n_k^{-1} (\mathbf{X}'_k \mathbf{J}_k) (\mathbf{J}'_k \mathbf{X}_k)] = \widehat{\sigma}_k^2 [\mathbf{X}'_k \mathbf{X}_k - n_k^{-1} (2n_k \mathbf{f}_k) (2n_k \mathbf{f}'_k)]$$
  
565 
$$= \widehat{\sigma}_k^2 [\mathbf{X}'_k \mathbf{X}_k - 4n_k \mathbf{f}_k \mathbf{f}'_k],$$

566 where  $\widehat{\sigma}_k^2 = \frac{1}{n_k - 1} \sum_{i=1}^{n_k} (y_{ki} - \bar{y}_k)^2$  for quantitative traits under the standard linear

567 regression model, and  $\widehat{\sigma}_k^2 = \bar{y}_k (1 - \bar{y}_k)$  for dichotomous traits under the standard  
568 logistic regression model.

569 Similarly, the joint  $\mathbf{V}$  is given by

570 
$$\mathbf{V} = \widetilde{\sigma}^2 [\mathbf{X}' \mathbf{X} - 4n \mathbf{f} \mathbf{f}'] = \widetilde{\sigma}^2 \left[ \sum_{k=1}^K \mathbf{X}'_k \mathbf{X}_k - 4n \mathbf{f} \mathbf{f}' \right]$$
  
571 
$$= \widetilde{\sigma}^2 \left[ \sum_{k=1}^K (\mathbf{X}'_k \mathbf{X}_k - 4n_k \mathbf{f}_k \mathbf{f}'_k) - 4 \sum_{k=1}^K n_k (\mathbf{f} \mathbf{f}' - \mathbf{f}_k \mathbf{f}'_k) \right]$$
  
572 
$$= \widetilde{\sigma}^2 \left[ \sum_{k=1}^K \left[ \frac{\mathbf{V}_k}{\widehat{\sigma}_k^2} \right] - 4 \sum_{k=1}^K n_k (\mathbf{f} \mathbf{f}' - \mathbf{f}_k \mathbf{f}'_k) \right],$$

573 where  $\widetilde{\sigma}^2 = \frac{1}{n-1} \sum_{k=1}^K [(n_k - 1) \widehat{\sigma}_k^2 + n_k \delta_k^2]$  for quantitative traits under the standard linear  
574 regression model, and  $\widetilde{\sigma}^2 = \bar{y}(1 - \bar{y})$  for dichotomous traits under the standard logistic  
575 regression model.

576

## 577 **Appendix B.2: Score Statistics with Covariates**

578 In cases with covariates, the same formula is derived for approximating the joint score  
579 statistic vector  $\mathbf{u}$  as in the simplified case (Appendix B.1) but with  $\delta_k = \bar{\mu} - \bar{\mu}_k$ , where

580  $\bar{\mu}_k = \frac{1}{n_k} \sum_{i=1}^{n_k} \widehat{\mu}_{ki}$  is the average of the fitted mean  $\widehat{\mu}_k$  in the null model (study k);  $\bar{\mu} =$

581  $\frac{1}{n} \sum_{k=1}^K (n_k \bar{\mu}_k)$  is the approximated average of the fitted mean  $\bar{\mu}$  with combined data. Note

582 that  $\tilde{\boldsymbol{\mu}} = (\tilde{\boldsymbol{\mu}}_1, \dots, \tilde{\boldsymbol{\mu}}_K)'$ , and  $(\widehat{\boldsymbol{\mu}}_k + \delta_k)$  is an unbiased estimate for  $\tilde{\boldsymbol{\mu}}_k$ . The formulas for the  
 583 variance-covariance matrix  $\mathbf{V}$  will be more complicated.

584 Under the standard linear regression model (Equation 1) for quantitative traits,  $\tilde{\mathbf{P}} =$

585  $\tilde{\sigma}^2 \mathbf{I}_n$ ,  $\mathbf{X}'\mathbf{X} = \sum_{k=1}^K \mathbf{X}'_k \mathbf{X}_k$ ,  $\mathbf{X}'\mathbf{C} = \sum_{k=1}^K \mathbf{X}'_k \mathbf{C}_k$ ,  $\mathbf{C}'\mathbf{C} = \sum_{k=1}^K \mathbf{C}'_k \mathbf{C}_k$ . We can write  $\mathbf{V}$  as

586 
$$\mathbf{V} = \tilde{\sigma}^2 (\mathbf{X}'\mathbf{X} - \mathbf{X}'\mathbf{C}(\mathbf{C}'\mathbf{C})^{-1}\mathbf{C}'\mathbf{X})$$

587 
$$= \tilde{\sigma}^2 \left( \sum_{k=1}^K [\mathbf{X}'_k \mathbf{X}_k - \mathbf{X}'_k \mathbf{C}_k (\mathbf{C}'_k \mathbf{C}_k)^{-1} \mathbf{C}'_k \mathbf{X}_k] + \right.$$

588 
$$\left. - \left( \sum_{k=1}^K \mathbf{X}'_k \mathbf{C}_k (\mathbf{C}'_k \mathbf{C}_k)^{-1} \mathbf{C}'_k \mathbf{X}_k \right) - \left( \sum_{k=1}^K \mathbf{X}'_k \mathbf{C}_k \right) \left( \sum_{k=1}^K \mathbf{C}'_k \mathbf{C}_k \right)^{-1} \left( \sum_{k=1}^K \mathbf{X}'_k \mathbf{C}_k \right)' \right)$$

588 
$$= \tilde{\sigma}^2 \left( \sum_{k=1}^K \left[ \frac{\mathbf{V}_k}{\tilde{\sigma}_k^2} \right] + \sum_{k=1}^K \left( \mathbf{X}'_k \mathbf{C}_k (\mathbf{C}'_k \mathbf{C}_k)^{-1} \mathbf{C}'_k \mathbf{X}_k \right) - \right.$$

588 
$$\left. \left( \sum_{k=1}^K \mathbf{X}'_k \mathbf{C}_k \right) \left( \sum_{k=1}^K \mathbf{C}'_k \mathbf{C}_k \right)^{-1} \left( \sum_{k=1}^K \mathbf{X}'_k \mathbf{C}_k \right)' \right).$$

589 In this case,  $\tilde{\sigma}_k^2 = \frac{1}{n_k - 1} \sum_{i=1}^{n_k} (y_{ki} - \widehat{\mu}_{kl})^2$  and  $\tilde{\boldsymbol{\mu}}_k \approx \widehat{\boldsymbol{\mu}}_k + \delta_k$ , the estimate of the noise

590 variance in the joint model  $\tilde{\sigma}^2 = \frac{1}{n-1} \sum_{k=1}^K \sum_{i=1}^{n_k} (y_{ki} - \tilde{\mu}_{kl})^2$  can be approximated by

591 
$$\tilde{\sigma}^2 \approx \frac{1}{n-1} \sum_{k=1}^K \sum_{i=1}^{n_k} (y_{ki} - \widehat{\mu}_{kl} - \delta_k)^2 = \frac{1}{n-1} \sum_{k=1}^K \sum_{i=1}^{n_k} [(y_{ki} - \widehat{\mu}_{kl})^2 - 2\delta_k (y_{ki} - \widehat{\mu}_{kl}) + \delta_k^2]$$

592 
$$= \frac{1}{n-1} \sum_{k=1}^K \left[ \sum_{i=1}^{n_k} [(y_{ki} - \widehat{\mu}_{kl})^2] - 2\delta_k \sum_{i=1}^{n_k} (y_{ki} - \widehat{\mu}_{kl}) + n_k \delta_k^2 \right]$$

593 
$$= \frac{1}{n-1} \sum_{k=1}^K \left[ \left( \sum_{i=1}^{n_k} (y_{ki} - \widehat{\mu}_{kl})^2 \right) + (n_k \delta_k^2) \right]$$

594 
$$= \frac{1}{n-1} \sum_{k=1}^K [(n_k - 1) \tilde{\sigma}_k^2 + n_k \delta_k^2],$$

595 where  $\sum_{i=1}^{n_k} (y_{ki} - \widehat{\mu}_{kl}) = n_k (\bar{y}_k - \widehat{\mu}_k) = 0$ .

596 Under the standard logistic regression model (Equation 2) for dichotomous traits,  $\tilde{\mathbf{P}} =$

597  $\text{diag}(\tilde{\mathbf{P}}_1, \dots, \tilde{\mathbf{P}}_K)$ ,  $\tilde{\mathbf{P}}_k = \text{diag}(\tilde{\boldsymbol{\mu}}_k(1 - \tilde{\boldsymbol{\mu}}_k)) \approx \widehat{\mathbf{P}}_k + \Delta_k \mathbf{I}_k$  with

$$\begin{aligned} 598 \quad \Delta_k &= \overline{\mu}_k(1 - \overline{\mu}_k) - \widehat{\mu}_k(1 - \widehat{\mu}_k) = (\overline{\mu}_k + \delta_k)(1 - \overline{\mu}_k - \delta_k) - \widehat{\mu}_k(1 - \widehat{\mu}_k) \\ 599 \quad &= \delta_k(1 - 2\overline{\mu}_k - \delta_k). \end{aligned}$$

600 We can write  $V$  as

$$\begin{aligned} 601 \quad V &= X'(\tilde{P} - \tilde{P}C(C'\tilde{P}C)^{-1}C'\tilde{P})X = X'\tilde{P}X - (X'\tilde{P}C)(C'\tilde{P}C)^{-1}(C'\tilde{P}X) \\ 602 \quad &= \sum_{k=1}^K X'_k \tilde{P}_k X_k - \left( \sum_{k=1}^K X'_k \tilde{P}_k C_k \right) \left( \sum_{k=1}^K X'_k \tilde{P}_k C_k \right)^{-1} \left( \sum_{k=1}^K X'_k \tilde{P}_k C_k \right)' \\ 603 \quad &\approx \sum_{k=1}^K X'_k (\widehat{P}_k + \Delta_k I_k) X_k - \\ 604 \quad &\left( \sum_{k=1}^K X'_k (\widehat{P}_k + \Delta_k I_k) C_k \right) \left( \sum_{k=1}^K X'_k (\widehat{P}_k + \Delta_k I_k) C_k \right)^{-1} \left( \sum_{k=1}^K X'_k (\widehat{P}_k + \Delta_k I_k) C_k \right)' \\ 605 \quad &= \sum_{k=1}^K \left[ X'_k \widehat{P}_k X_k - (X'_k \widehat{P}_k C_k)(C'_k \widehat{P}_k C_k)^{-1}(X'_k \widehat{P}_k C_k)' \right] + \\ 606 \quad &\sum_{k=1}^K \Delta_k X'_k X_k + \sum_{k=1}^K \left[ (X'_k \widehat{P}_k C_k)(C'_k \widehat{P}_k C_k)^{-1}(X'_k \widehat{P}_k C_k)' \right] - \\ 607 \quad &\left( \sum_{k=1}^K (X'_k \widehat{P}_k C_k + \Delta_k X'_k C_k) \right) \left( \sum_{k=1}^K (C'_k \widehat{P}_k C_k + \Delta_k C'_k C_k) \right)^{-1} \left( \sum_{k=1}^K (X'_k \widehat{P}_k C_k + \Delta_k X'_k C_k) \right)' \\ 608 \quad &= \sum_{k=1}^K V_k + \sum_{k=1}^K \Delta_k X'_k X_k + \sum_{k=1}^K \left[ (X'_k \widehat{P}_k C_k)(C'_k \widehat{P}_k C_k)^{-1}(X'_k \widehat{P}_k C_k)' \right] - \\ 609 \quad &\left( \sum_{k=1}^K (X'_k \widehat{P}_k C_k + \Delta_k X'_k C_k) \right) \left( \sum_{k=1}^K (C'_k \widehat{P}_k C_k + \Delta_k C'_k C_k) \right)^{-1} \left( \sum_{k=1}^K (X'_k \widehat{P}_k C_k + \Delta_k X'_k C_k) \right)'. \end{aligned}$$

610 To use the above formulas to estimate  $V$ , besides  $(V_k, \Delta_k, \widehat{\sigma}_k^2, \delta_k)$ , the quantities of  
611  $X'_k X_k, C'_k C_k, X'_k C_k, C'_k \widehat{P}_k C_k, X'_k \widehat{P}_k C_k$  also need to be shared from individual studies.

612

### 613 Appendix C: Simulation Studies

614 We first simulated a pool of 20,000 haplotypes (with length 5KB) for each of the three  
615 populations, European (EUR), Asian (ASA), and African (AFR), by COSI with the well

616 calibrated coalescent model<sup>24</sup>. Then we sampled genotypes of  $1 \times 10^5$  individuals per  
617 population with 339 variants, where 96% are rare with MAFs <5%. Regions of 100  
618 variants were randomly selected as risk loci to simulate phenotypes (see spectrum plots  
619 of  $\log_{10}(\text{MAFs})$  in Figure S1).

620 We simulated both quantitative and dichotomous phenotypes according to the  
621 respective standard linear and logistic models (Equations 1 and 2). Under the linear  
622 regression model (Equation 1), we selected residual variance  $\sigma_\epsilon^2$  and effect-sizes  $\beta$  such  
623 that a given amount of heritability was equally explained by all causal variants; under the  
624 logistic model (Equation 2), we selected the intercept term subject to 1% disease  
625 prevalence and the log-odds-ratios  $\beta$  by  $\left(\frac{s}{f_j(1-f_j)}\right)$  with a given constant  $s$ . These  
626 parameters will be set to result in ~80% power in the simulations, and equal variance  
627 contributions from all causal variants.

628 Two covariate scenarios were simulated: (i) common covariates ( $C_1, C_2$ ) for all  
629 studies; (ii) different covariates among studies — the first and third studies have single  
630 covariate ( $C_1$ ), the third study has two covariates ( $C_1, C_2$ ), while the second and fifth  
631 studies have three covariates ( $C_1, C_2, C_3$ ). Specifically,  $C_1$  is a binary covariate generated  
632 from *Bernoulli*( $p = 0.5$ );  $C_2$  and  $C_3$  are continuous covariates generated from  $N(0, 1)$ .  
633 The covariate coefficients were selected such that 1% phenotype variance was equally  
634 explained per covariate in the linear model, i.e.,  $(\alpha_1 = 0.2)$ ,  $(\alpha_1 = 0.141, \alpha_2 = 0.071)$ ,  
635  $(\alpha_1 = 0.115, \alpha_2 = \alpha_3 = 0.057)$ , respectively for models with covariates  $(C_1)$ ,  $(C_1, C_2)$ ,  
636  $(C_1, C_2, C_3)$ . The covariates coefficients were taken as 0.1 in the logistic model.

637 For each scenario, we first generated 100 sets of phenotypes and corresponding  
638 covariates for all samples in the population. Then we randomly drew samples with  
639 corresponding phenotypes, genotypes, and covariates from the simulated populations.

640  
641  
642  
643

**Figure 1. Empirical type I errors (with significance level  $\alpha = 2.5 \times 10^{-6}$ ) for null simulations of balanced (B) and unbalanced (UB) dichotomous studies, with common covariates.**

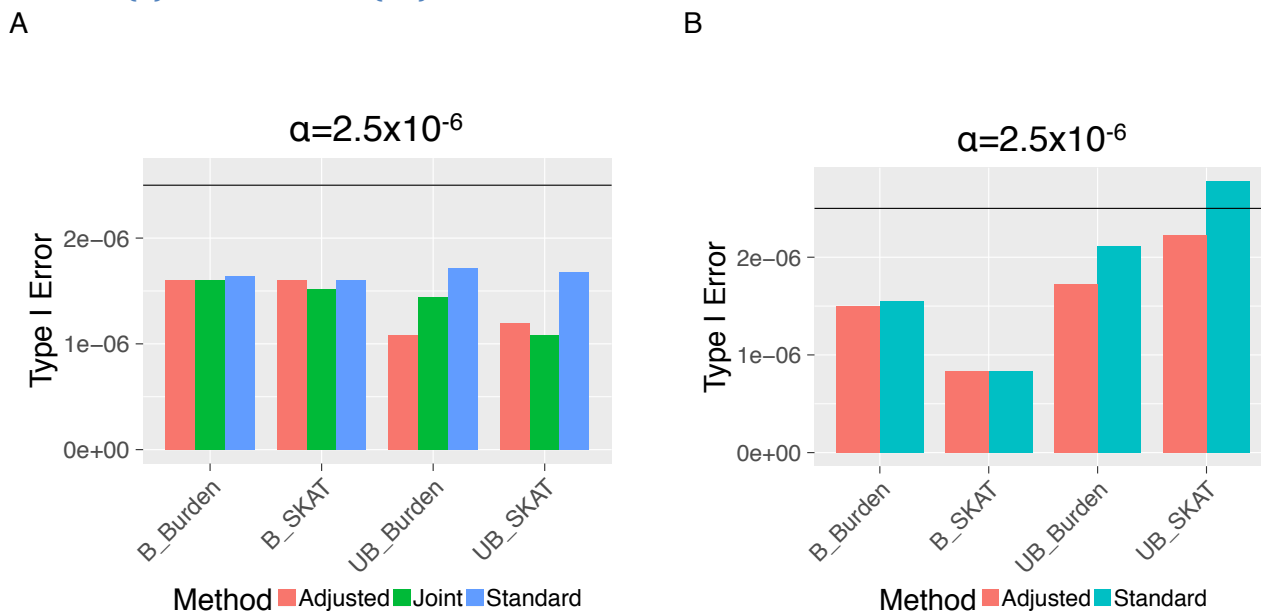

644  
645  
646  
647  
648  
649

A: Scenario without population stratification; B: Scenario with population stratification.  
“Adjusted” denotes our new meta-analysis methods; “Standard” denotes the standard meta-analysis methods;  
and “Joint” denotes the joint analyses using combined individual-level data.

650 Figure 2. Score statistics (A, B, C, D) and  $-\log_{10}(\text{p values})$  of the corresponding single-variant score tests (E, F, G, H), for dichotomous studies with common  
 651 covariates, without population stratification, under balanced and unbalanced settings.

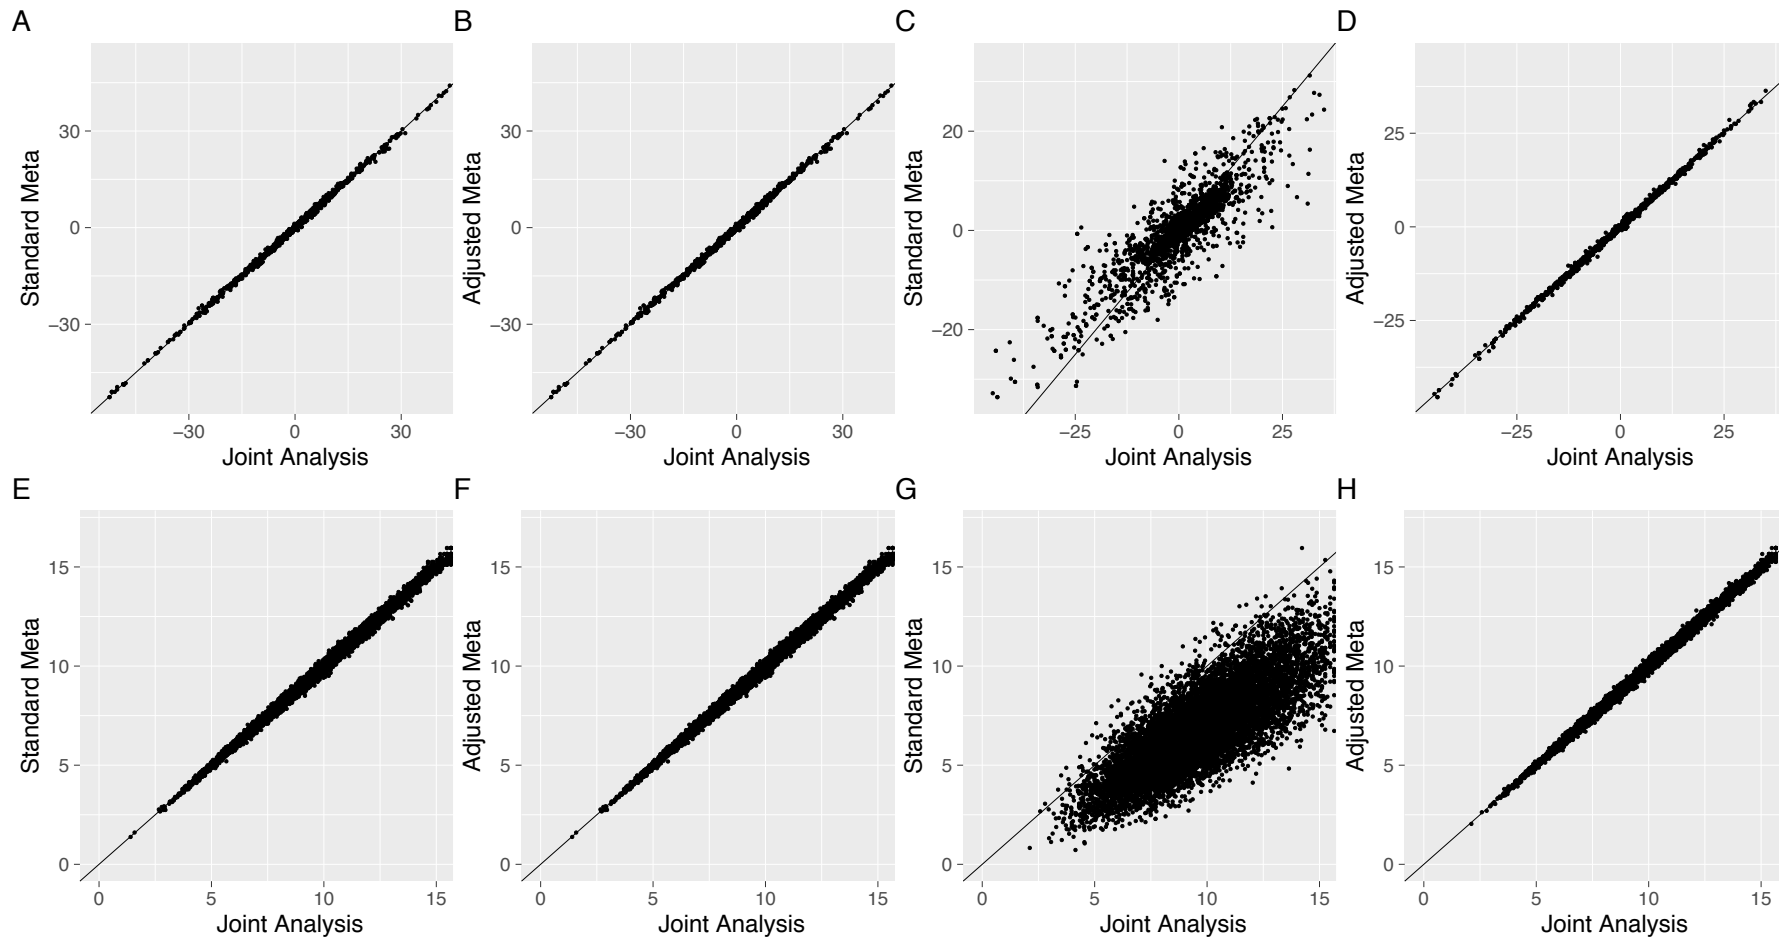

652 (A, B): Score statistics under balanced studies; (C, D) Score statistics under unbalanced studies;  
 653 (E, F):  $-\log_{10}(\text{p values})$  of single-variant score tests under balanced studies; (G, H)  $-\log_{10}(\text{p values})$  of single-variant score tests under unbalanced studies.  
 654 “Standard Meta” denotes the standard meta-analysis methods; “Adjusted Meta” denotes our new meta-analysis methods.

655  
656

**Figure 3. Power comparisons of meta-Burden test and meta-SKAT, for balanced (B) and unbalanced (UB) dichotomous studies with common covariates.**

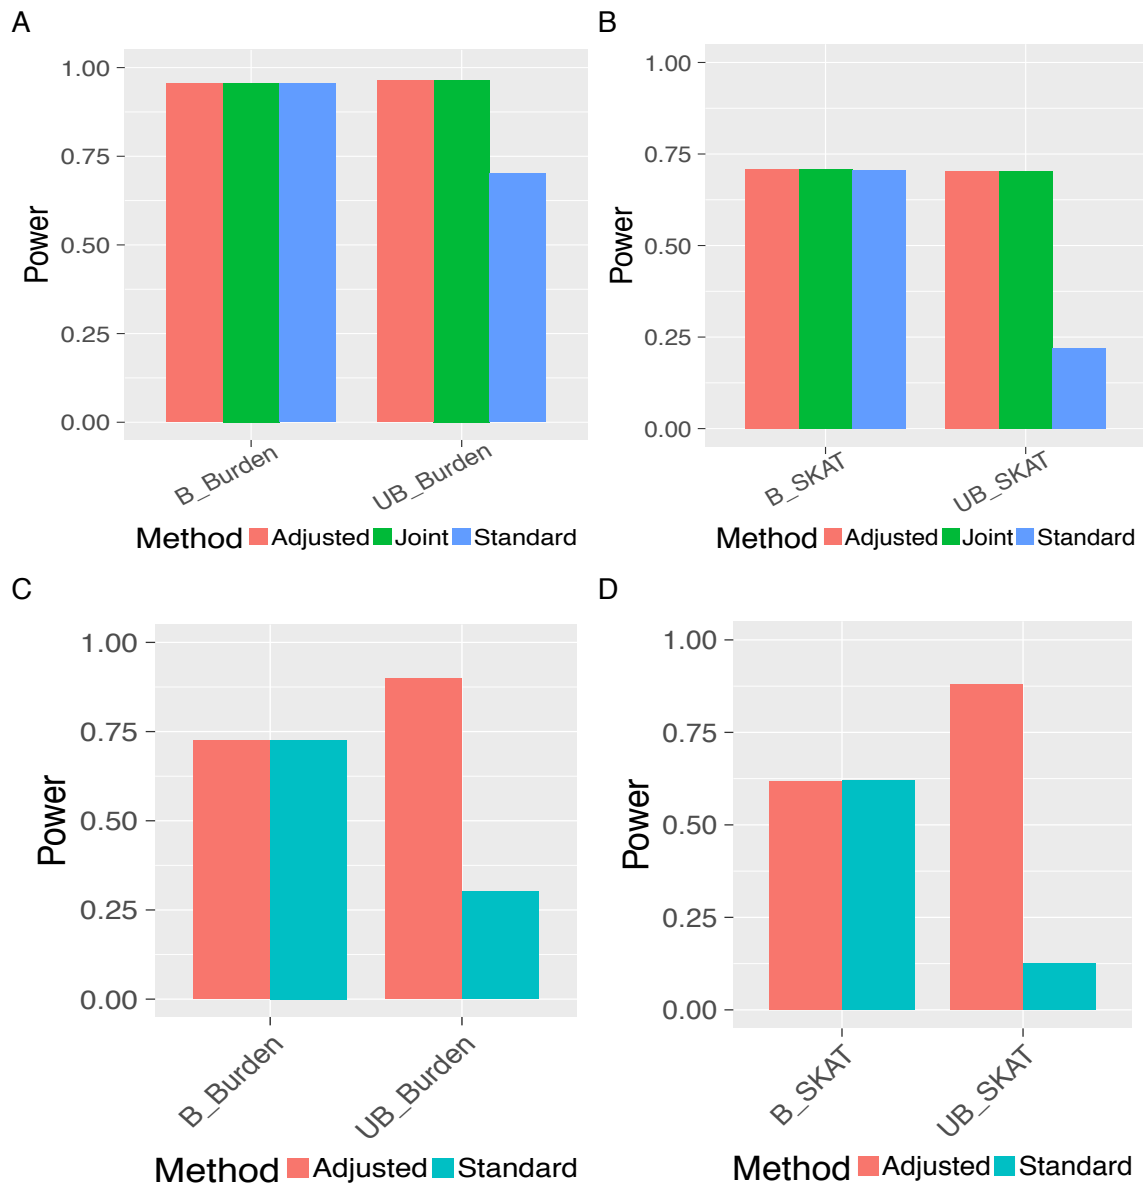

657  
658  
659  
660  
661  
662  
663  
664  
665

(A, B): Without population stratification;

(C, D): With population stratification.

“Adjusted” denotes our new meta-analysis methods; “Standard” denotes the standard meta-analysis methods; and “Joint” denotes the joint analyses using combined individual-level data.

666 **Figure 4. Manhattan plots of meta GWASs of type 2 diabetes, by standard method (A) and our adjusted**  
667 **method (B).**

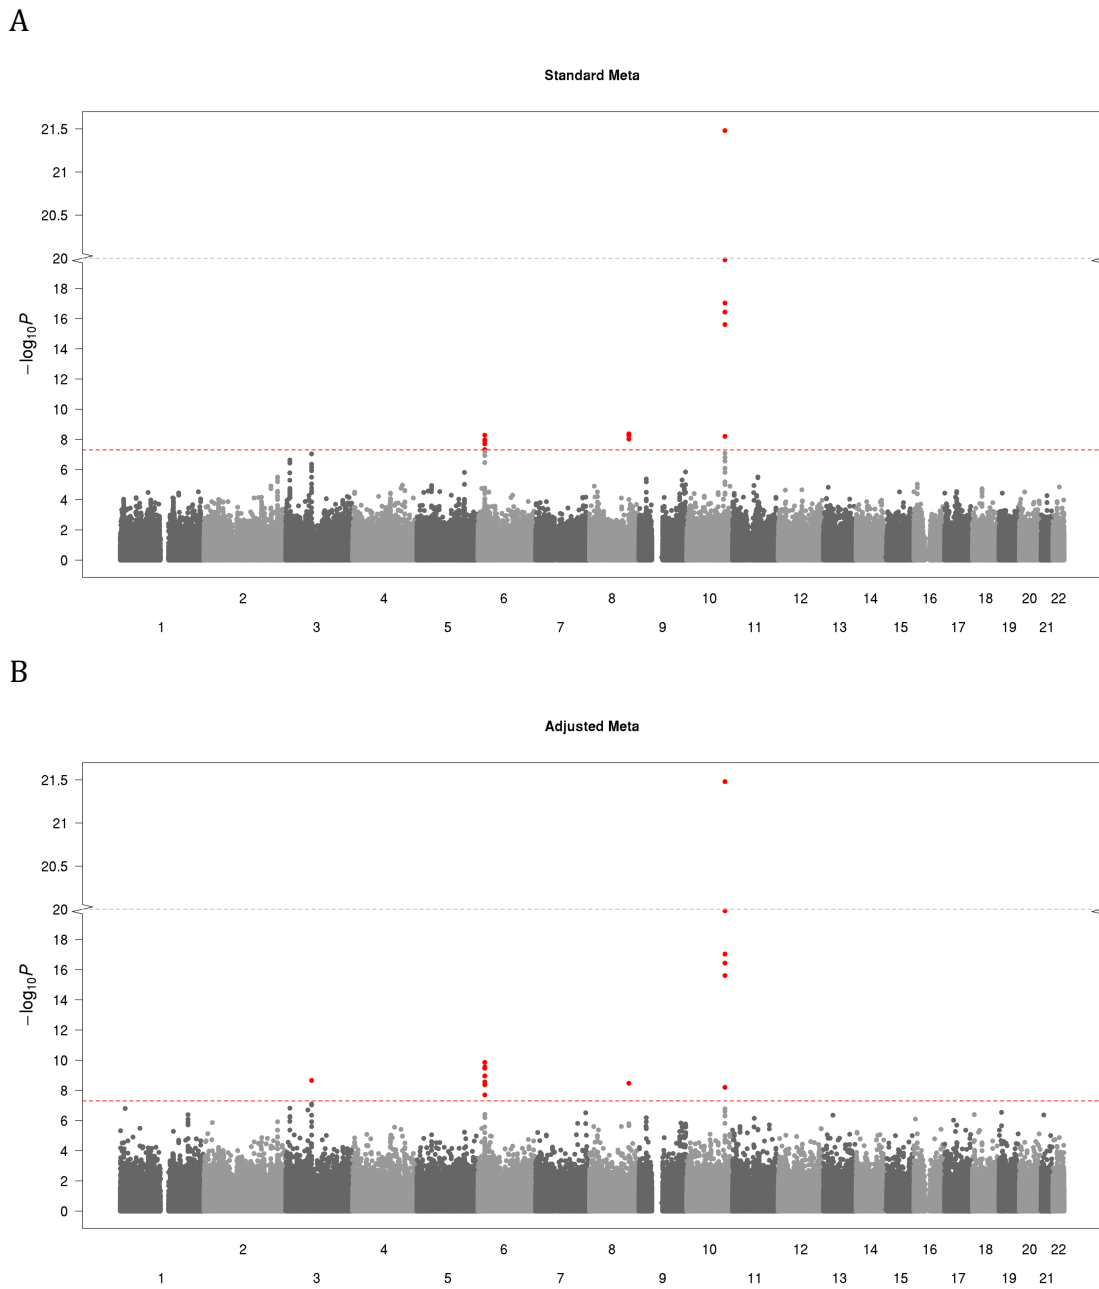

668 “Standard Meta” denotes the standard meta-analysis methods; “Adjusted Meta” denotes our new meta-analysis  
669 methods.

670

671

672



## 673 Reference

- 674 1. Lin, D.Y., and Zeng, D. (2010). Meta-analysis of genome-wide association studies: no  
675 efficiency gain in using individual participant data. *Genetic epidemiology* 34, 60-  
676 66.
- 677 2. Scott, L.J., Mohlke, K.L., Bonnycastle, L.L., Willer, C.J., Li, Y., Duren, W.L., Erdos,  
678 M.R., Stringham, H.M., Chines, P.S., Jackson, A.U., et al. (2007). A genome-  
679 wide association study of type 2 diabetes in Finns detects multiple susceptibility  
680 variants. *Science* 316, 1341-1345.
- 681 3. Zeggini, E., Scott, L.J., Saxena, R., Voight, B.F., Marchini, J.L., Hu, T., de Bakker,  
682 P.I., Abecasis, G.R., Almgren, P., Andersen, G., et al. (2008). Meta-analysis of  
683 genome-wide association data and large-scale replication identifies additional  
684 susceptibility loci for type 2 diabetes. *Nature genetics* 40, 638-645.
- 685 4. Fuchsberger, C., Flannick, J., Teslovich, T.M., Mahajan, A., Agarwala, V., Gaulton,  
686 K.J., Ma, C., Fontanillas, P., Moutsianas, L., McCarthy, D.J., et al. (2016). The  
687 genetic architecture of type 2 diabetes. *Nature* 536, 41-47.
- 688 5. Willer, C.J., Sanna, S., Jackson, A.U., Scuteri, A., Bonnycastle, L.L., Clarke, R.,  
689 Heath, S.C., Timpson, N.J., Najjar, S.S., Stringham, H.M., et al. (2008). Newly  
690 identified loci that influence lipid concentrations and risk of coronary artery  
691 disease. *Nature genetics* 40, 161-169.
- 692 6. Willer, C.J., Speliotes, E.K., Loos, R.J., Li, S., Lindgren, C.M., Heid, I.M., Berndt, S.I.,  
693 Elliott, A.L., Jackson, A.U., Lamina, C., et al. (2009). Six new loci associated with  
694 body mass index highlight a neuronal influence on body weight regulation.  
695 *Nature genetics* 41, 25-34.
- 696 7. Stahl, E.A., Raychaudhuri, S., Remmers, E.F., Xie, G., Eyre, S., Thomson, B.P., Li,  
697 Y., Kurreeman, F.A., Zhernakova, A., Hinks, A., et al. (2010). Genome-wide  
698 association study meta-analysis identifies seven new rheumatoid arthritis risk  
699 loci. *Nature genetics* 42, 508-514.
- 700 8. Prokopenko, I., Langenberg, C., Florez, J.C., Saxena, R., Soranzo, N., Thorleifsson,  
701 G., Loos, R.J., Manning, A.K., Jackson, A.U., Aulchenko, Y., et al. (2009).  
702 Variants in MTNR1B influence fasting glucose levels. *Nature genetics* 41, 77-81.
- 703 9. Willer, C.J., Li, Y., and Abecasis, G.R. (2010). METAL: fast and efficient meta-  
704 analysis of genomewide association scans. *Bioinformatics* 26, 2190-2191.
- 705 10. Lee, S., Teslovich, T.M., Boehnke, M., and Lin, X. (2013). General framework for  
706 meta-analysis of rare variants in sequencing association studies. *American*  
707 *journal of human genetics* 93, 42-53.
- 708 11. Tang, Z.Z., and Lin, D.Y. (2013). MASS: meta-analysis of score statistics for  
709 sequencing studies. *Bioinformatics* 29, 1803-1805.
- 710 12. Feng, S., Liu, D., Zhan, X., Wing, M.K., and Abecasis, G.R. (2014). RAREMETAL:  
711 fast and powerful meta-analysis for rare variants. *Bioinformatics* 30, 2828-2829.
- 712 13. Liu, D.J., Peloso, G.M., Zhan, X., Holmen, O.L., Zawistowski, M., Feng, S., Nikpay,  
713 M., Auer, P.L., Goel, A., Zhang, H., et al. (2014). Meta-analysis of gene-level  
714 tests for rare variant association. *Nature genetics* 46, 200-204.
- 715 14. Sudlow, C., Gallacher, J., Allen, N., Beral, V., Burton, P., Danesh, J., Downey, P.,  
716 Elliott, P., Green, J., Landray, M., et al. (2015). UK biobank: an open access  
717 resource for identifying the causes of a wide range of complex diseases of  
718 middle and old age. *PLoS Med* 12, e1001779.

- 719 15. Stouffer, S.A.S., Edward A; DeVinney, Leland C; Star, Shirley A; Williams Jr, Robin  
720 M. (1949). *The American soldier: adjustment during army life.*(Oxford, England:  
721 Princeton University Press).  
722 16. Cochran, W.G. (1954). The combination of estimates from different experiments.  
723 *Biometrics* 10, 101-129.  
724 17. Genomes Project, C., Abecasis, G.R., Auton, A., Brooks, L.D., DePristo, M.A.,  
725 Durbin, R.M., Handsaker, R.E., Kang, H.M., Marth, G.T., and McVean, G.A.  
726 (2012). An integrated map of genetic variation from 1,092 human genomes.  
727 *Nature* 491, 56-65.  
728 18. Price, A.L., Patterson, N.J., Plenge, R.M., Weinblatt, M.E., Shadick, N.A., and Reich,  
729 D. (2006). Principal components analysis corrects for stratification in genome-  
730 wide association studies. *Nature genetics* 38, 904-909.  
731 19. Radhakrishna Rao, C. (1948). Large sample tests of statistical hypotheses  
732 concerning several parameters with applications to problems of estimation.  
733 *Mathematical Proceedings of the Cambridge Philosophical Society* 44, 50-57.  
734 20. Morris, A.P., and Zeggini, E. (2010). An evaluation of statistical approaches to rare  
735 variant analysis in genetic association studies. *Genetic epidemiology* 34, 188-  
736 193.  
737 21. Neale, B.M., Rivas, M.A., Voight, B.F., Altshuler, D., Devlin, B., Orho-Melander, M.,  
738 Kathiresan, S., Purcell, S.M., Roeder, K., and Daly, M.J. (2011). Testing for an  
739 unusual distribution of rare variants. *PLoS genetics* 7, e1001322.  
740 22. Wu, M.C., Lee, S., Cai, T., Li, Y., Boehnke, M., and Lin, X. (2011). Rare-variant  
741 association testing for sequencing data with the sequence kernel association  
742 test. *American journal of human genetics* 89, 82-93.  
743 23. Fritsche, L.G., Igl, W., Bailey, J.N., Grassmann, F., Sengupta, S., Bragg-Gresham,  
744 J.L., Burdon, K.P., Hebbiring, S.J., Wen, C., Gorski, M., et al. (2015). A large  
745 genome-wide association study of age-related macular degeneration highlights  
746 contributions of rare and common variants. *Nature genetics*.  
747 24. Schaffner, S.F., Foo, C., Gabriel, S., Reich, D., Daly, M.J., and Altshuler, D. (2005).  
748 Calibrating a coalescent simulation of human genome sequence variation.  
749 *Genome research* 15, 1576-1583.  
750 25. Yang, J., Fritsche, L.G., Zhou, X., Abecasis, G., and International Age-Related  
751 Macular Degeneration Genomics, C. (2017). A Scalable Bayesian Method for  
752 Integrating Functional Information in Genome-wide Association Studies.  
753 *American journal of human genetics*.  
754 26. Laakso, M., Kuusisto, J., Stancakova, A., Kuulasmaa, T., Pajukanta, P., Lusi, A.J.,  
755 Collins, F.S., Mohlke, K.L., and Boehnke, M. (2017). The Metabolic Syndrome in  
756 Men study: a resource for studies of metabolic and cardiovascular diseases.  
757 *Journal of lipid research* 58, 481-493.  
758 27. Price, A.L., Kryukov, G.V., de Bakker, P.I., Purcell, S.M., Staples, J., Wei, L.J., and  
759 Sunyaev, S.R. (2010). Pooled association tests for rare variants in exon-  
760 resequencing studies. *American journal of human genetics* 86, 832-838.  
761 28. Billings, L.K., and Florez, J.C. (2010). The genetics of type 2 diabetes: what have we  
762 learned from GWAS? *Ann N Y Acad Sci* 1212, 59-77.  
763
